# Supplementary material for: Impact of Genetic Improvements of Rice on Its Water Use and Effects of Climate Variability in Egypt
Source: MDPI journal article supplement (doi:10.3390/agriculture11090865), 2021-09-10
Supplement: s1 [file s1]

Supplementary Table S1. Days to maturity of the studied rice cultivars.

| Cultivar | Days to Maturity |
|----------|------------------|
| Sakha101 | 140              |
| Sakha102 | 125              |
| Sakha104 | 135              |
| Sakha107 | 122              |
| Sakha108 | 135              |
| Giza177  | 125              |
| Giza178  | 135              |
| Giza179  | 122              |

Supplementary Table S2: Average minimum temperature, maximum temperature, precipitation, relative humidity, and precipitation on- and off-season of the rice cultivated areas in Egypt during cropping seasons of the study period.

| Cropping Year | Minimum temperature (°C) | Maximum temperature (°C) | Average Relative humidity (%) | Average precipitation off-season (mm) | Average precipitation on-season (mm) |
|---------------|--------------------------|--------------------------|-------------------------------|---------------------------------------|--------------------------------------|
| 2000          | 16.91                    | 38.75                    | 58.64                         | 15.69                                 | 3.31                                 |
| 2001          | 17.29                    | 37.82                    | 58.98                         | 12.57                                 | 0.99                                 |
| 2002          | 16.90                    | 39.29                    | 58.76                         | 16.07                                 | 0.95                                 |
| 2003          | 18.25                    | 37.26                    | 58.41                         | 12.99                                 | 0.04                                 |
| 2004          | 17.04                    | 37.78                    | 58.76                         | 17.94                                 | 0.06                                 |
| 2005          | 16.54                    | 37.46                    | 58.63                         | 10.03                                 | 0.22                                 |
| 2006          | 16.23                    | 36.21                    | 57.97                         | 15.11                                 | 0.30                                 |
| 2007          | 17.72                    | 38.13                    | 58.54                         | 12.16                                 | 0.69                                 |
| 2008          | 17.07                    | 37.46                    | 57.44                         | 10.91                                 | 3.77                                 |
| 2009          | 16.78                    | 37.90                    | 57.62                         | 9.80                                  | 1.51                                 |
| 2010          | 17.65                    | 36.57                    | 57.83                         | 5.59                                  | 0.29                                 |
| 2011          | 17.31                    | 37.66                    | 57.93                         | 15.18                                 | 0.39                                 |
| 2012          | 18.14                    | 38.50                    | 57.36                         | 14.62                                 | 0.68                                 |
| 2013          | 18.67                    | 35.89                    | 57.49                         | 14.05                                 | 0.67                                 |
| 2014          | 18.42                    | 36.86                    | 57.37                         | 10.46                                 | 1.91                                 |
| 2015          | 17.52                    | 36.98                    | 58.27                         | 21.57                                 | 2.80                                 |
| 2016          | 18.21                    | 37.16                    | 57.87                         | 26.56                                 | 3.05                                 |
| 2017          | 18.06                    | 38.32                    | 57.96                         | 15.01                                 | 7.39                                 |
| 2018          | 19.74                    | 37.48                    | 58.25                         | 0.64                                  | 0.07                                 |

Source: data collected and averaged from NASA prediction of worldwide energy resources (<https://power.larc.nasa.gov/data-access-viewer/>)

Supplementary Table S3. Phillips–Perron (PP) unit test results of the rice productivity and the climate change variables.

| Variables              | L(0)      |                     |         | L(1 <sup>st</sup> ) |                     |          |
|------------------------|-----------|---------------------|---------|---------------------|---------------------|----------|
|                        | Intercept | Trend and Intercept | None    | Intercept           | Trend and Intercept | None     |
| <b>lnY<sub>1</sub></b> | -0.868    | -1.023              | -0.444  | -2.000              | -3.204              | -1.849** |
| <b>lnX<sub>1</sub></b> | -1.703    | -3.057              | 1.508   | -6.479*             | -11.422*            | -5.909*  |
| <b>lnX<sub>2</sub></b> | -4.621*   | -4.931*             | -0.882  | -15.763*            | -22.392*            | -15.396* |
| <b>lnX<sub>3</sub></b> | -2.191    | -2.396              | -0.344  | -7.218*             | -17.051*            | -7.184*  |
| <b>lnX<sub>4</sub></b> | -2.145    | -1.881              | -1.215  | -3.426**            | -3.386              | -3.541*  |
| <b>lnX<sub>5</sub></b> | -3.373**  | -4.078**            | -2.567* | -5.340*             | -5.029*             | -5.598*  |

Y1: rice crop productivity; X1: minimum temperature; X2: maximum temperature; X3: relative humidity; X4: off-season precipitation and X5: on-season precipitation .Note: \*\* and \*indicate significance at alpha = 0.05, and 0.01, respectively.

Supplementary Table S4. The bounds test for the existence of a long-term relationship between rice productivity and climate factors.

| F-statistics | Critical values | I (0) lower bounds | I (1) Upper bounds | Conclusion    |
|--------------|-----------------|--------------------|--------------------|---------------|
| 5.071        | 1.0%            | 3.06               | 4.15               | Cointegration |
|              | 2.5%            | 2.70               | 3.73               |               |
|              | 5.0%            | 2.39               | 3.38               |               |
|              | 10.0%           | 2.08               | 3.00               |               |
